# Supplementary material for: Soil-landscape relationship in sandstone-gneiss topolithosequence in Amazonas, Brazil
Source: Copernicus journal article supplement (doi:10.5194/se-2019-131), 2019-09-03
Supplement: Supplementary file [file se-2019-131-RC1-supplement.pdf]

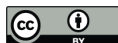

1 **Soil-landscape relationship in sandstone-gneiss topolithosequence in Amazonas, Brazil**

2 Julimar da Silva Fonseca<sup>1</sup>, Milton César Costa Campos<sup>1</sup>, Elilson Gomes de Brito Filho<sup>1\*</sup>, Bruno Campos

3 Mantovanelli<sup>2</sup>, Laércio Santos Silva<sup>3</sup>, Alan Ferreira Leite de Lima<sup>1</sup>, José Maurício Da Cunha<sup>1</sup>, Emily Lira

4 Simões<sup>1</sup>, Luís Antônio Coutrim dos Santos<sup>1</sup>

5 <sup>1</sup>Universidade Federal do Amazonas - UFAM, Instituto de Educação, Agricultura e Ambiente, Humaitá,

6 Amazonas, Brasil

7 <sup>2</sup>Universidade Federal de Santa Maria - UFSM, departamento de agronomia, Santa Maria, Rio Grande do Sul,

8 Brasil.

9 <sup>3</sup>Universidade Estadual Paulista - UNESP, departamento de agronomia, Jaboticabal, São Paulo, Brasil.

10 \*Corresponding author: Elilson Gomes de Brito Filho, Instituto de Educação, Agricultura e Ambiente –

11 Universidade Federal do Amazonas (UFAM), Humaitá, Amazonas, Brasil, Zip code: 69800-000, telephone:

12 +5597981121704, e-mail: bfsambiente@gmail.com.



13 **1 Abstract** 

14 Soil position in the landscape reveals its history of formation and genesis. Therefore, the landscape is the  
15 combination of features of the surface of the earth with subsurface components (parent material), while the  
16 soil is a three-dimensional, dynamic natural body inserted in the landscape. This research aimed to study the  
17 soil-landscape relationship in a sandstone-gneiss topolithosequence in Amazonas, Brazil. The study was  
18 carried out along a 9.253-meter transect from the top downwards the softer slope. Soil profiles were selected  
19 in five landscape compartments (top, upper third, lower third, transport foothill, and deposition foothill).  
20 Morphological, mineralogical, physical, chemical, and ray diffraction characterizations were performed. Soils  
21 had different morphological, physical, chemical, and mineralogical attributes due to the variations of the  
22 geological substrate and landscape position. The mineralogy of the clay fraction is composed of kaolinite,  
23 goethite, hematite, and gibbsite, with goethite being the predominant iron oxide. A sand fraction dominance  
24 was observed in relation to the other fractions in all the profiles, being related to the alluvial nature of the  
25 parent material, with the highest values occurring in the lower third. The separation of the landscape into  
26 geomorphic surfaces and identification of the parent material were effective for understanding the variation of  
27 soil attributes along the landscape.

28 **2 Introduction** 

29 The soil is the product of the combinations of factors and processes of formation governed by the local  
30 conditions of its occurrence. The intensity of these factors and processes promote progressive transformations  
31 in the parent material, which over time are expressed by morphological, chemical, physical, and mineralogical  
32 soil properties. Thus, considering the Amazonian environments, climate conditions of high temperature and  
33 high precipitation prevail in the Brazilian Amazon, favoring an intense mineral weathering and, therefore, the  
34 formation of soils with predominant characteristics (Dalamerlinda et al., 2017). For this reason, it is necessary  
35 to recognize the interaction among these factors and their role in soil formation (Campos et al., 2012a; Silva,  
36 2016).

37 Soil position in the landscape reveals its history of formation and genesis (Campos et al., 2011). Thus, the  
38 landscape is the combination of features of the surface of the earth with subsurface components (parent  
39 material), while the soil is a three-dimensional, dynamic natural body inserted in the landscape (Minasny and  
40 Mcbratney, 2006). In general, soil attributes present the characteristics of the matrix rock, but at a local scale,



41 the occurrence of attributes can be very different due to the existence of more lithologic substrate or even the  
42 predominance of a specific formation process (Campos et al., 2012a). Thus, the relief, although considered a  
43 supporting factor, acts on the spatial distribution of soil attributes, water dynamics, presence of unconsolidated  
44 sediments, pedogenetic development, and processes that translate into the most varied soil types (Bockheim et  
45 al., 2005; Vasconcelos et al., 2012; LI et al., 2015).

46 For a better understanding of the soils in the landscape, the preconized concepts of the soil-landscape  
47 relationship become necessary as criteria for understanding the spatiotemporal variability of soil attributes and  
48 visualization of dynamic processes such as the transport of water, solutes, and sediments (Sommer, 2006;  
49 Campos et al., 2011). Despite the great representation of the Middle Madeira River region, the most common  
50 physiographic environments are floodplains, native fields, and transition areas, which are dominated by  
51 Inceptisols, Ultisols, and Entisols, thus showing the main characteristic of the Amazon region as a function of  
52 the exuberant grouping of landscapes associated with different soil classes in a short space of geographical  
53 position (Campos et al., 2012a; Campos et al., 2012b).

54 The direct effects of the composition of the parent material have been studied in the literature. Montanari et al.  
55 (2010) found the dominance of goethite and kaolinite in a concave landform in relation to linear and convex  
56 landforms, while the highest hematite contents occurred in linear landforms. Curi and Franzmeier (1984)  
57 studied a toposequence of Oxisols and found higher gibbsite concentration in the highest landscape position  
58 and kaolinite in the lowest positions associated with goethites of lower mean crystal diameter. All these  
59 investigations reinforce the importance of characterizing soil mineralogy to reinforce the relationship between  
60 the landscape and parent material, especially Fe and Al oxides because their formation is influenced by  
61 environmental conditions and persist for a long time in the soil (Kämpf and Curi, 2000).

62 Despite the long territorial extension of the Amazon region, studies have been conducted and various  
63 characteristics and peculiarities of its landscape have revealed new directions in studies on the soil-landscape  
64 relationship. Thus, the properties of the soil-landscape relationship associated with the behavior of parent  
65 material transmit records of the intensity of pedogenetic processing conditions that prevailed in the  
66 environment that influenced the formation of these soils. Therefore, this research aimed to study the soil-  
67 landscape relationship in a sandstone-gneiss topolithosequence in mazonas, Brazil.

### 68 **3 Material and methods**



### 69 3.1 Characterization of the physical environment

70 The study area is located at BR 230 km 150 – Transamazônica, municipality of Manicoré, AM – direction of  
71 Machadinho do Oeste, RO, at Rodovia do Estanho km 14, located between the geographical coordinates  
72 08°08'12.6" S and 61°50'06.5" W (Figure 1). According to the Köppen classification, the regional climate is  
73 classified as Am, i.e. a rainy tropical climate (monsoon rains), with a dry period of short duration, temperatures  
74 varying from 25 to 27 °C, and annual precipitation of 2,500 mm with the rainy season beginning in October  
75 and extending until June and relative air humidity between 85 and 90%.

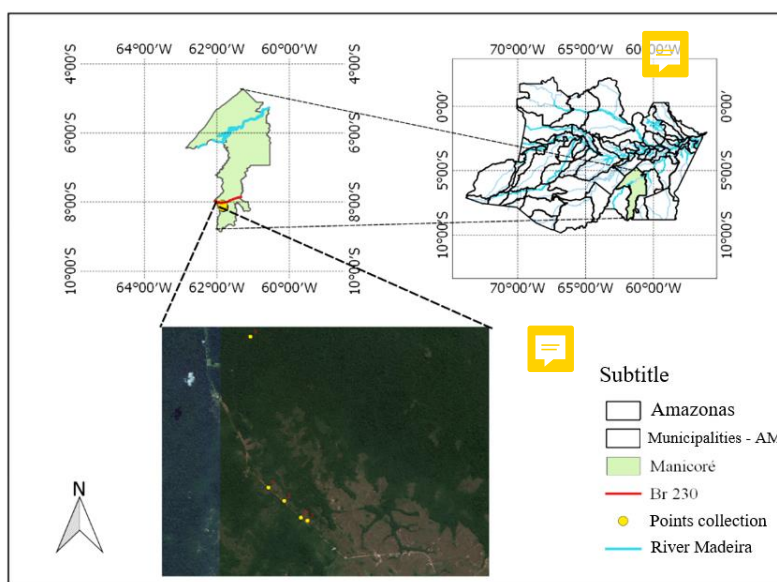

76  
77 Figure 1. Location of the profiles studied in the municipality of Manicoré in the state of Amazonas, Brazil.  
78 Source: ©Google Maps.

79 Relief configuration is marked by the presence of plateaus in the highest parts, which exhibit flat topographic  
80 surfaces, with the border area marked by aligned hills and ridges, while the lower areas constitute a  
81 pediplanated surface, locally interrupted by flat top hills (CPRM, 2001).

82 Regarding the geology, the study area is located on Rondonian Granites characterized by the presence of  
83 muscovite, biotite, adamelites, and granodiorites of intrusive cratogenic origin, in the form of stocks and  
84 batholiths (BRASIL, 1978). According to ZEE (2008), regional soils are Oxisols. The characteristic vegetation  
85 of this region is a dense tropical forest consisting of densified and multi-layered trees between 20 and 50 meters  
86 in height (figure 2).

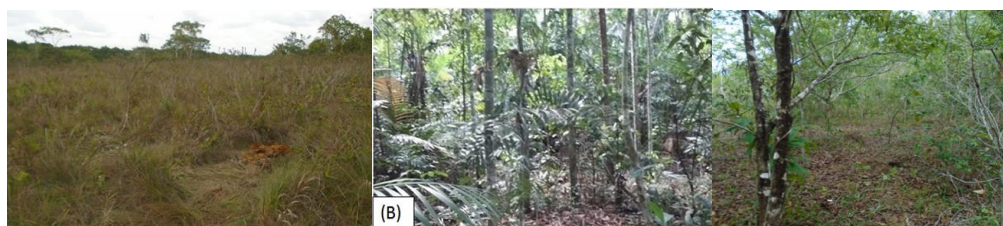

87

88 Figure 2. Images of the collection environment.

### 89 3.2 Field methodology

90 The study was carried out along a 9.253-meter transect from the top downwards the softer slope to the  
91 deposition foothill. Measurements of the altitudes were carried out along this transect to make the altimetric  
92 profile. Based on the model of Dalrymple et al. (1968), hillside segments were identified mainly based on the  
93 variation of the terrain slope (Figure 3).

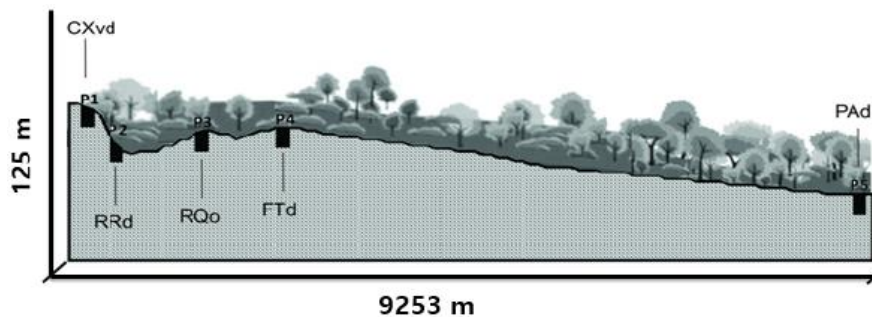

94

95 Figure 3. Schematic profile of the terrain topography and trench position in the topolithosequence in  
96 Amazonas, Brazil.

97 Five trenches were opened along the hillside topography following the transect illustrated in Figure 3 in order  
98 to characterize the soils, as follows: top (08°08'46.0" S and 61°49'25.1" W), upper third (08°08'41.8" S and  
99 61°49'33.9" W), lower third (08°08'18.3" S and 61°49'56.3" W), transport foothill (08°07'59.6" S and  
100 61°50'17.4" W), and deposition foothill (08°07'59.6" S and 61°50'17.4" W). The identification of horizons  
101 and morphological description, followed by the sampling of soil horizons, were performed according to Santos  
102 et al. (2013). Soils were classified according to criteria established by the Brazilian Soil Classification System  
103 (Santos et al., 2013).

104 Twenty samples were collected at different soil profiles: Top: A – 0.0–0.16 m and AB – 0.16–0.30 m; upper  
105 third: A – 0.0–0.12 m and ACr – 0.10–0.20 m; lower third: A – 0.0–0.7 m and C1 – 0.15–0.33 m; transport



106 foothill: A – 0.0–0.18 m and AB – 0.18–0.33 m; and deposition foothill: A – 0.0–0.18 m and AB – 0.18–0.32  
107 m. The criterion for choosing the depths was the coincidence with surface and subsurface diagnostic horizons.

### 108 **3.3 Particle size analysis**

109 Particle size analysis was performed by the pipette method using a 0.1 mol L<sup>-1</sup> NaOH solution as a chemical  
110 dispersant and mechanical stirring in a low rotation apparatus for 16 h (Donagema et al., 2017). The clay  
111 fraction was separated by gravitational sedimentation, the coarse and fine sand fraction by sieving, and the silt  
112 fraction was calculated by difference.

### 113 **3.4 Chemical analysis**

114 Soil pH was determined in water and 1.0 mol L<sup>-1</sup> KCl solution in the soil to solution ratio of 1:2.5 (Donagema  
115 et al., 2017). The exchangeable cations Ca<sup>2+</sup>, Mg<sup>2+</sup>, and Al<sup>3+</sup> were extracted with 1.0 mol L<sup>-1</sup> KCl and measured  
116 by atomic absorption spectroscopy. The hydrogen ion and Al<sup>3+</sup> were extracted with 0.5 mol L<sup>-1</sup> calcium acetate  
117 at pH 7.0 and determined by titration (0.025 mol L<sup>-1</sup> NaOH) (Donagema et al., 2017). Organic carbon was  
118 determined by the wet oxidation method (Walkley and Black, 1934).

119 Bioavailable particulate phosphorus (P<sub>bp</sub>) was determined by extraction with anion exchange resin (AER).  
120 The principle of phosphorus extraction by AER is its continuous removal from the solution by the exchange  
121 with bicarbonate of the resin, creating a concentration gradient that forces the exit of the surface of colloids  
122 until an electrochemical equilibrium is reached between the soil and AER (Skogley and Dobermann, 1996).  
123 For this, the methodology developed by Kroth (1998) was used as follows: 0.5 g of soil (1 mm) was added in  
124 15 mL falcon tubes containing 10 mL distilled water and a sheet of AER saturated with 0.5 mol L<sup>-1</sup> NaHCO<sub>3</sub>.  
125 These tubes were stirred for 16 hours on an end-over-end stirrer (33 rpm). The sheets were removed and  
126 washed with distilled water jets and then diluted in 10 mL 0.5 mol L<sup>-1</sup> HCl. The tubes remained uncapped for  
127 90 minutes and then closed and stirred for 30 minutes in a horizontal stirrer. Subsequently, a 3 mL aliquot was  
128 taken from the extract to determine the P content according to Murphy and Riley (1962). The sum of bases  
129 (SB), cation exchange capacity (CEC), base saturation (V), and aluminum saturation (m) were calculated based  
130 on the results of the chemical analyses.

### 131 **3.5 Mineralogical analysis**

132 The minerals of the clay fraction hematite (Hm), goethite (Gt), kaolinite (Kt), and gibbsite (Gb) were  
133 characterized by X-ray diffractometry using the powder method after the concentration of iron oxides by



134 boiling the clay fraction in NaOH (Norrish and Taylor, 1961) and deferrifying it by the method of Mehra and  
135 Jackson (1960). The samples were diffracted with scanning speed of  $1^\circ 2\theta \text{ min}^{-1}$  using a Mini-Flex Rigaku II  
136 (20 mA, 30 kV) equipped with Cu  $K\alpha$  radiation. The Hm/(Gt+ Hm) ratio was estimated by comparing the peak  
137 areas from the Hm/(Gt+Hm) with the proportions of relationships obtained from standard Gt–Hm mixtures.  
138 The percentages of Hm and Gt were calculated by allocating the difference between Fed and Feo to these  
139 oxides. The Kt/(Kt+Gb) ratio was calculated by peak areas of Gb (002) and Kt (001) reflections. The  
140 calculation of the content of isomorphous substitution of iron by aluminum in Gt was obtained by the equation  
141  $\text{mol mol}^{-1} = 1730 - 572 c$  (Schulze, 1984). For the calculation of the content of isomorphous substitution of iron  
142 by aluminum in Hm, the equation  $\text{mol mol}^{-1} = 3098.8 - 615.12 a_0$  (Schwertmann et al., 1989) was used. The  
143 specific surface area (SSA) of Gt was estimated by the formula  $\text{SSA (Gt)} = (1049/\text{MCD gt } 100)^{-5} (\text{m}^2 \text{ g}^{-1})$ ,  
144 according to Schulze and Schwertmann (1984),  $\text{MCD}_{100} = \text{MCD (110)} \times 0.42 \text{ nm}$  (Kämpf, 1981), and the  
145 SSA of Hm was estimated by the formula  $\text{SSA (Hm)} = 2 \times (r + h) \times d (\text{m}^2 \text{ g}^{-1})$ , according to (Schwertmann  
146 and Kämpf, 1985). The mean crystal diameter (MCD) of Hm and Gt was calculated from the width at half-  
147 height (WHH) and the position of mineral reflections using the Scherrer equation (Klug and Alexander, 1974).

## 148 **4 Results**

### 149 **4.1 Soil distribution in the landscape**

150 A physiognomy formed by plains was observed in this locality due to the minimal variation of relief. This  
151 characteristic is typical in Amazonian environments probably because of the gradual transition action that  
152 occurs between fields and the forest in this region. The lowest terrain position is colonized by small shrub  
153 species, where there are flood conditions at certain times of the year. Dalrymple et al. (1968) established  
154 hypothetical units of hillsides, which may be partially absent or repeated along them. In this study, five hillside  
155 segments were identified and mapped in a representative toposequence of the region (Figure 3).

156 The first three hillside segments of the landscape, represented by the top, upper third, and lower third, with  
157 elevations from 120 to 125 m, are grouped similarly among each other. This position in the landscape does not  
158 confer greater stability to soil attributes, mainly due to the classification of these soils, thus evidencing the  
159 total influence of the landscape on its attributes. The third segment is the transport foothill (119 m), with a  
160 residual erosional character, starting from the edges of the lower third and showing a slightly sloping  
161 conformation to the fifth segment, which may have been formed by relief microvariations of the previous



162 segment. Finally, the fifth segment is the deposition foothill, which presents lower altitudes than the top  
163 (between 114 and 116 m), but with different topographic characteristics. In this case, it may be considered a  
164 stable geomorphic environment.

165 The pedogenesis of these soils evidences the action of more than one parent material since the partition is  
166 composed of five distinct classes in the different segments. Considering that these classes were developed on  
167 different sandstone-gneiss parent materials, they are the main cause of alterations in soil attributes at different  
168 magnitudes. As observed by Marques Júnior and Lepsch (2000) and Campos (2012c), understanding the  
169 different parent materials in a landscape favor the understanding of the variability of soil attributes, thus  
170 indicating that geology provides subsidies to explain the local relief and soil behavior.

#### 171 **4.2 Morphological and textural attributes**

172 The genesis and classification showed that all profiles have a moderate diagnostic surface A horizon (Table  
173 1). The topographic position of the top showed an incipient subsurface diagnostic B horizon, with no evidence  
174 of predominant pedogenic process, being classified as a leptic Dystrorphic Ta Haplic Cambisol.

175 Soils of the upper and lower third are poorly evolved, consisting of mineral material or organic material lower  
176 than 20 cm thick, with no type of diagnostic B horizon. In the upper third, the soil was characterized as a  
177 Regolithic Neosol because it is in a lytic contact at a depth higher than 50 cm and A horizon overlying C or Cr  
178 horizon, presenting altered primary minerals, with gravels from the ACr horizon at a depth of 12–35 cm and  
179 presence of fragments of semi-weathered rocks (Santos et al., 2013). On the same surface, there was the  
180 presence of Quartzarenic Neosol (lower third), soils with no lytic contact within 50 cm of depth, with sequences  
181 of A–C horizons, but showing a sand or loamy sand texture in all horizons up to at least 150 cm, mainly  
182 consisting of quartz with coarse and fine sand fractions and whitish colors (Santos et al., 2013).

183 The transport foothill, submitted to a higher influence of seasonal variations of the water table, presented  
184 mottles in the subsurface horizons of a reddish color, with a small size and distinct contrast. Associated with  
185 the mottled color is the presence of plinthite and petroplinthite in amounts varying from common to abundant,  
186 corresponding to values between 15 and 40% of the soil volume. These attributes indicate the occurrence of  
187 the plinthization pedogenic process, being a diagnostic character of the plinthic horizon, according to the  
188 Brazilian Soil Classification System (SiBCS) (Santos et al., 2013). From the attributes and identified horizons,  
189 the profile was classified, at suborder level, as an 3.3 Argiluvic Plinthosol.





190 In this segment, there was the presence of an abruptic Dystrophic Yellow Argisol (deposition foothill),  
191 presenting textural B horizon and predominance of colors with hue 10 YR and 7.5 YR in the first 100 cm of  
192 the B horizon. In this soil, the slope was determinant for the selective removal of clay, contributing to the  
193 formation of a textural gradient. In summary, the mineralogical, physical, and chemical results of the  
194 characterized profiles accurately elucidated the characteristics of the sandstone-gneiss rock that originated the  
195 soils along the topolithosequence.

196 Soil colors ranged from very dark grayish brown to dark brown in the surface horizons (Table 1). Thus, a clear  
197 differentiation was observed for subsurface horizons that have colors from yellowish brown to very pale  
198 brown. The grayish tones were observed in most horizons, being this coloration associated with a low  
199 concentration of iron oxides and predominance of light-colored minerals such as kaolinite and quartz in the  
200 sand fraction (EMBRAPA, 2013). This behavior can be verified in Table 3, which shows the predominance of  
201 goethite in all profiles, even in the Plinthosol, which showed higher increases of hematite.

202 Surface horizons had the predominance of a weak, small, medium to large structure in the composition of the  
203 top and foothill (Table 1). On the other hand, in transport and deposition foothills predominated a moderate,  
204 medium, coarse to large structure. According to Silva et al. (2001), the soil drainage, conditioned by the  
205 topographic position, has a strong relationship with the type of structure because moderately to well-drained  
206 soils tend to have granular or angular and subangular blocky structures, while poorly to imperfectly drained  
207 soils tend to exhibit a standard structure in polygonal prisms. Campos et al. (2012a) observed that the relief  
208 conditions influenced several soil attributes, considering that the slope creates a complex pattern of transport  
209 of water and solutes, acting mainly on soil profile development.

210 The surface horizon of all profiles presented a sandy loam textural class, except for Neosols, which presented  
211 a sandy constitution (Table 1). The dominance of the sand fraction in the profiles is explained by the parent  
212 material, composed of sandstones of the Palmeiral Formation and Nova Campo Verde Complex. However, the  
213 increase in the clay fraction in the Argisol from the Bt1–Bt2–Btf horizon stood out. As highlighted by Campos  
214 et al. (2011) and verified in our study, Argisol and Plinthosol seem to have undergone a process of rejuvenation  
215 due to their position in the landscape, with a probable loss of clay from the surface horizons, resulting in an  
216 abrupt textural change.

217

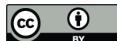

218 TABLE 1. Morphological and granulometric attributes of a topolithosequence in Amazonas, Brazil.

| Horizon                                                          | Depth   | Color     | Texture    | Structure                                                        | Clay | Silt | Fine sand | Coarse sand | Total sand | S/C  |
|------------------------------------------------------------------|---------|-----------|------------|------------------------------------------------------------------|------|------|-----------|-------------|------------|------|
| Top – Leptic Dystrorphic Ta.Haplic Cambisol – CXvd               |         |           |            |                                                                  |      |      |           |             |            |      |
| A                                                                | 0–16    | 10 YR 3/2 | Sandy loam | weak, small, granular                                            | 128  | 182  | 386       | 304         | 690        | 1.43 |
| AB                                                               | 16–30   | 10 YR 3/2 | Sandy loam | moderate to medium, angular and subangular blocks                | 132  | 198  | 393       | 277         | 670        | 1.50 |
| Bi                                                               | 30–55   | 10 YR 4/6 | Sandy loam | weak, medium, angular and subangular blocks                      | 139  | 213  | 416       | 232         | 648        | 1.53 |
| BCr                                                              | 55–78+  | 10 YR 4/4 | Sandy loam | weak, small to medium, granular                                  | 142  | 212  | 422       | 224         | 646        | 1.49 |
| Upper third – Leptic Dystrorphic Regolithic Neosol – RRd         |         |           |            |                                                                  |      |      |           |             |            |      |
| A                                                                | 0–12    | 10 YR 3/2 | Sandy loam | weak, small, granular                                            | 118  | 141  | 241       | 500         | 741        | 1.19 |
| ACr                                                              | 12–35   | 10 YR 4/6 | Sandy loam | weak, small, angular and subangular blocks                       | 111  | 159  | 269       | 460         | 730        | 1.43 |
| Cr/Bi                                                            | 35–62   | 10 YR 6/6 | Sandy loam | weak, small, angular and subangular blocks                       | 116  | 161  | 289       | 441         | 723        | 1.33 |
| Lower third – Typic Orthic Quartzarenic Neosol – RQo             |         |           |            |                                                                  |      |      |           |             |            |      |
| A                                                                | 0–15    | 10 YR 3/2 | Sand       | weak, small to medium, granular                                  | 56   | 53   | 62        | 829         | 891        | 0.94 |
| C <sub>1</sub>                                                   | 15–33   | 10 YR 7/2 | Sandy loam | weak, large, angular and subangular blocks                       | 50   | 61   | 121       | 768         | 889        | 1.21 |
| C <sub>2</sub>                                                   | 33–50   | 10 YR 7/3 | Loamy sand | moderate, medium to large, angular and subangular blocks         | 49   | 87   | 130       | 734         | 864        | 1.78 |
| C <sub>3</sub>                                                   | 50–75   | 10 YR 7/3 | Loamy sand | moderate, medium to large, angular and subangular blocks         | 59   | 88   | 83        | 770         | 853        | 1.49 |
| Cr                                                               | 75–105+ | 10 YR 6/4 | Loamy sand | moderate, medium to large, angular and subangular blocks         | 53   | 98   | 126       | 723         | 849        | 1.86 |
| Transport foothill – Typic Dystrorphic Argillic Plinthosol – FTd |         |           |            |                                                                  |      |      |           |             |            |      |
| A                                                                | 0–18    | 10 YR 2/1 | Sandy loam | moderate, medium to large, granular                              | 131  | 306  | 413       | 150         | 563        | 2.32 |
| AB                                                               | 18–33   | 10 YR 3/2 | Sandy loam | weak, medium to large, angular and subangular blocks             | 146  | 329  | 467       | 58          | 525        | 2.26 |
| B <sub>Af</sub>                                                  | 33–48   | 10 YR 4/6 | Loam       | weak to moderate, small to medium, angular and subangular blocks | 205  | 336  | 435       | 24          | 459        | 1.64 |
| B <sub>f</sub>                                                   | 48–70   | 10 YR 5/6 | Loam       | strong, large, angular and subangular blocks                     | 257  | 360  | 362       | 21          | 383        | 1.41 |
| BCr                                                              | 70–110+ | 10 YR 6/4 | Loam       | strong, medium to large, angular and subangular blocks           | 258  | 297  | 452       | 13          | 445        | 1.15 |
| Deposition foothill – Abruptic Dystrorphic Yellow Argisol – Pad  |         |           |            |                                                                  |      |      |           |             |            |      |
| A <sub>1</sub>                                                   | 0–18    | 10 YR 5/6 | Sandy loam | weak, small to large, granular                                   | 99   | 146  | 406       | 349         | 755        | 1.49 |
| A <sub>2</sub>                                                   | 18–32   | 10 YR 5/6 | Sandy loam | moderate, medium to large, angular and subangular blocks         | 99   | 172  | 415       | 314         | 729        | 1.73 |
| AB                                                               | 32–49   | 10 YR 5/6 | Sandy loam | strong, medium to large, angular and subangular blocks           | 95   | 205  | 416       | 284         | 700        | 2.15 |
| B <sub>tl</sub>                                                  | 49–74   | 10 YR 6/8 | Clay       | strong, medium to large, angular and subangular blocks           | 548  | 218  | 188       | 47          | 234        | 0.40 |
| B <sub>tl</sub>                                                  | 74–110  | 10 YR 6/4 | Clay       | strong, large to very large, angular and subangular blocks       | 558  | 228  | 189       | 26          | 215        | 0.41 |
| B <sub>fl</sub>                                                  | 110–125 | 10 YR 6/8 | Clay       | strong, large to very large, angular and subangular blocks       | 563  | 230  | 202       | 5           | 207        | 0.41 |

219 S/C: silt to clay ratio.



220 Soils of the upper and lower third are poorly evolved, consisting of mineral material or organic material lower  
221 than 20 cm thick, with no type of diagnostic B horizon. In the upper third, the soil was characterized as a  
222 Regolithic Neosol because it is in a lytic contact at a depth higher than 50 cm and A horizon overlying C or  
223 Cr horizon, presenting altered primary minerals, with gravels from the ACr horizon at a depth of 12–35 cm  
224 and presence of fragments of semi-weathered rocks (Santos et al., 2013). On the same surface, there was the  
225 presence of Quartzarenic Neosol (lower third), soils with no lytic contact within 50 cm of depth, with  
226 sequences of A–C horizons, but showing a sand or loamy sand texture in all horizons up to at least 150 cm,  
227 mainly consisting of quartz with coarse and fine sand fractions and whitish colors (Santos et al., 2013).

228 The transport foothill, submitted to a higher influence of seasonal variations of the water table, presented  
229 mottles in the subsurface horizons of a reddish color, with a small size and distinct contrast. Associated with  
230 the mottled color is the presence of plinthite and petroplinthite in amounts varying from common to abundant,  
231 corresponding to values between 15 and 40% of the soil volume. These attributes indicate the occurrence of  
232 the plinthization pedogenic process, being a diagnostic character of the plinthic horizon, according to the  
233 Brazilian Soil Classification System (SiBCS) (Santos et al., 2013). From the attributes and identified horizons,  
234 the profile was classified, at suborder level, as an 3.3 Argiluvic Plinthosol.

235 In this segment, there was the presence of an abruptic Dystrophic Yellow Argisol (deposition foothill),  
236 presenting textural B horizon and predominance of colors with hue 10 YR and 7.5 YR in the first 100 cm of  
237 the B horizon. In this soil, the slope was determinant for the selective removal of clay, contributing to the  
238 formation of a textural gradient. In summary, the mineralogical, physical, and chemical results of the  
239 characterized profiles accurately elucidated the characteristics of the sandstone-gneiss rock that originated the  
240 soils along the topolithosequence.

241 Soil colors ranged from very dark grayish brown to dark brown in the surface horizons (Table 1). Thus, a clear  
242 differentiation was observed for subsurface horizons that have colors from yellowish brown to very pale  
243 brown. The grayish tones were observed in most horizons, being this coloration associated with a low  
244 concentration of iron oxides and predominance of light-colored minerals such as kaolinite and quartz in the  
245 sand fraction (EMBRAPA, 2013). This behavior can be verified in Table 3, which shows the predominance of  
246 goethite in all profiles, even in the Plinthosol, which showed higher increases of hematite.

247 Surface horizons had the predominance of a weak, small, medium to large structure in the composition of the



248 top and foothill (Table 1). On the other hand, in transport and deposition foothills predominated a moderate,  
249 medium, coarse to large structure. According to Silva et al. (2001), the soil drainage, conditioned by the  
250 topographic position, has a strong relationship with the type of structure because moderately to well-drained  
251 soils tend to have granular or angular and subangular blocky structures, while poorly to imperfectly drained  
252 soils tend to exhibit a standard structure in polygonal prisms. Campos et al. (2012a) observed that the relief  
253 conditions influenced several soil attributes, considering that the slope creates a complex pattern of transport  
254 of water and solutes, acting mainly on soil profile development.

255 The surface horizon of all profiles presented a sandy loam textural class, except for Neosols, which presented  
256 a sandy constitution (Table 1). The dominance of the sand fraction in the profiles is explained by the parent  
257 material, composed of sandstones of the Palmeiral Formation and Nova Campo Verde Complex. However,  
258 the increase in the clay fraction in the Argisol from the Bt1–Bt2–Bt<sub>f</sub> horizon stood out. As highlighted by  
259 Campos et al. (2011) and verified in our study, Argisol and Plinthosol seem to have undergone a process of  
260 rejuvenation due to their position in the landscape, with a probable loss of clay from the surface horizons,  
261 resulting in an abrupt textural change.

262 In general, the profiles of the soil-landscape relationships presented morphological variations among each  
263 other, being the result of a variety of pedogenetic factors and processes. Ribeiro et al. (2012) indicated that the  
264 morphological characteristics are due to the soil constitution and conditions under which it was formed,  
265 allowing making inferences on pedogenetic processes and environmental conditions, as well as interpreting or  
266 predicting the plant behavior and the response of management practices.

267 Particle size composition showed a predominance of the sand fraction over the other fractions, with contents  
268 from 207 and 891 g kg<sup>-1</sup> (Table 1). These characteristics can be explained by the parent material (sandstone),  
269 which presented in their constitution predominance of quartz. These high values of total sand are in accordance  
270 with Schiavo et al. (2010), who characterized and classified soils developed from sandstones of the  
271 Aquidauana Formation.

272 In the A horizon, silt contents ranged from 53 to 306 g kg<sup>-1</sup>, with an increment in depth (Table 1). Low values  
273 are associated with young soils still in the formation process. In fact, because they are formed from alluvial  
274 sediments, a particle selection may have occurred, leaving in the soil lithogenic (more resistant to changes)  
275 and pedogenic materials (with a higher degree of crystallinity). Unlike the sand fraction, the clay fraction



276 increased gradually with depth, with values from 48 to 558 g kg<sup>-1</sup>. However, we cannot say this is a pedogenic  
277 process of eluviation and illuviation. The most likely is the selective removal of surface horizons (more sandy),  
278 with clay accumulation in the subsurface.

279 Neosols presented higher proportions of coarse fractions (> 2 mm) of consolidated ferruginous material as  
280 plinthite and petroplinthite due to a possible lowering of the water table, leading to a better drainage of the  
281 environment, which was confirmed by the presence of a more reddish hue (2.5 YR) in relation to the other  
282 profiles from 48 cm from the surface (Table 1). This predominance of coarser sand fractions, together with the  
283 marked presence of gravels, are indicative characteristics that the weathering processes in this soil were not  
284 able to promote a marked fragmentation of these fractions (EMBRAPA, 2013).

285 In the transport foothill, the clay contents ranged from 95 to 99 g kg<sup>-1</sup> in the A, AB, and BA horizons to 548  
286 g kg<sup>-1</sup> in the Bt1 horizon, 558 g kg<sup>-1</sup> in the Bt2 horizon, and 567 g kg<sup>-1</sup> in the Btf horizon. The marked textural  
287 differentiation between the A and Bt1 horizons characterizes an abrupt textural change with a significant  
288 increase of clay in relation to the overlying horizons (Table 1).

289 At the top and upper and lower thirds, the silt to clay ratio (S/C) ranged from 1.43 to 1.50 and 1.19 to 1.43,  
290 respectively (Table 1), being associated with less developed soils. The transport foothill showed the lowest  
291 S/C ratio, with values between 0.7 and 0.8. On the contrary, the deposition foothill presented the highest values  
292 (1.49) in the surface horizons but decreasing to 0.41 with variations in depth. According to Campos et al.  
293 (2011), higher values of S/C ratio are due to the low increase in the silt fraction or clay loss, suggesting that  
294 small relief variations provide relative losses or gains and, possibly, are not motivated by variations in the  
295 parent material.

296 Considering the topographic variations, clay and silt contents tended to increase towards the youngest  
297 geomorphic surfaces, i.e. from the top and thirds to the transport and deposition foothills, in an opposite  
298 direction to that of the total sand, which reflects their recent sedimentary nature since the soils of these  
299 geomorphic environments are closely related to the parent material. Campos et al. (2012b) also evidenced this  
300 condition when studying the soil-geomorphic surface relationships in a toposequence floodplain-upland in the  
301 region of Humaitá, AM, Brazil.

### 302 **4.3 Variation of chemical attributes**

303 The values of pH ranged from 4.17 to 5.48 (H<sub>2</sub>O) and 3.81 to 5.70 (KCl), especially in the upper and lower



304 thirds and deposition foothill, presenting the highest acidity content in the surface horizon. According to  
 305 Campos et al. (2012b), the high regional precipitation contributes significantly to base leaching, increasing  
 306 soil pH. The balance of negative net charges, expressed by  $\Delta\text{pH}$  in the B horizon, showed the highest values  
 307 at the top and upper and lower thirds, which is in accordance with the trend of occurring soils with a lower  
 308 degree of evolution in the youngest surface (Table 2).

309 TABLE 2. Soil chemical attributes in a topolithosequence in Amazonas, Brazil.

| Horizon                                                                  | pH               |      | Ca <sup>2+</sup>                               | Mg <sup>2+</sup> | K <sup>+</sup> | SB   | Al <sup>3+</sup> | H+Al  | CEC | m     | V                   | P resin | OC                 |
|--------------------------------------------------------------------------|------------------|------|------------------------------------------------|------------------|----------------|------|------------------|-------|-----|-------|---------------------|---------|--------------------|
|                                                                          | H <sub>2</sub> O | KCl  | ----- cmol <sub>c</sub> dm <sup>-3</sup> ----- |                  |                |      |                  | ----- |     | --%-- | mg dm <sup>-3</sup> |         | g kg <sup>-1</sup> |
| <b>Top – Leptic Dystrorphic Ta Haplic Cambisol – CXvd</b>                |                  |      |                                                |                  |                |      |                  |       |     |       |                     |         |                    |
| A                                                                        | 4.79             | 3.81 | 1.00                                           | 0.15             | 0.12           | 1.27 | 4.3              | 19.42 | 21  | 77    | 6                   | 4.6     | 59.33              |
| AB                                                                       | 4.94             | 4.50 | 0.20                                           | 0.14             | 0.11           | 0.35 | 4.4              | 19.38 | 20  | 93    | 2                   | 3.1     | 26.50              |
| Bi                                                                       | 4.62             | 4.42 | 0.30                                           | 0.09             | 0.12           | 0.51 | 4.9              | 18.48 | 19  | 91    | 3                   | 2.8     | 31.49              |
| BCr                                                                      | 5.11             | 4.34 | 0.20                                           | 0.06             | 0.070          | 0.33 | 4.8              | 19.32 | 20  | 94    | 2                   | 2.4     | 15.94              |
| <b>Upper third – Leptic Dystrorphic Regolithic Neosol – RRd</b>          |                  |      |                                                |                  |                |      |                  |       |     |       |                     |         |                    |
| A                                                                        | 4.17             | 3.89 | 0.40                                           | 0.17             | 0.11           | 0.68 | 5.5              | 18.21 | 19  | 87    | 4                   | 3.9     | 47.42              |
| ACr                                                                      | 4.41             | 4.3  | 0.20                                           | 0.14             | 0.09           | 0.43 | 5.4              | 16.23 | 17  | 91    | 3                   | 2.7     | 30.34              |
| Cr/Bi                                                                    | 5.19             | 4.25 | 0.30                                           | 0.14             | 0.09           | 0.53 | 5.2              | 14.47 | 15  | 89    | 4                   | 2.8     | 26.36              |
| <b>Lower third – Typic Orthic Quartzarenic Neosol – RQo</b>              |                  |      |                                                |                  |                |      |                  |       |     |       |                     |         |                    |
| A                                                                        | 4.91             | 4.16 | 0.20                                           | 0.12             | 0.09           | 0.41 | 4.3              | 19.17 | 20  | 91    | 2                   | 2.6     | 48.19              |
| C <sub>1</sub>                                                           | 5.2              | 4.70 | 0.40                                           | 0.12             | 0.06           | 0.58 | 5.3              | 17.25 | 18  | 90    | 3                   | 2.0     | 34.69              |
| C <sub>2</sub>                                                           | 4.97             | 4.43 | 0.40                                           | 0.12             | 0.08           | 0.60 | 5.5              | 15.88 | 16  | 90    | 4                   | 2.1     | 19.78              |
| C <sub>3</sub>                                                           | 4.72             | 4.16 | 0.20                                           | 0.12             | 0.08           | 0.40 | 5.7              | 17.77 | 18  | 93    | 2                   | 2.2     | 6.34               |
| Cr                                                                       | 4.8              | 4.13 | 0.50                                           | 0.15             | 0.10           | 0.75 | 5.6              | 18.21 | 19  | 88    | 4                   | 2.1     | 0.19               |
| <b>Transport foothill – Typic Dystrorphic Argiluvic Plinthosol – FTd</b> |                  |      |                                                |                  |                |      |                  |       |     |       |                     |         |                    |
| A                                                                        | 4.95             | 3.97 | 0.40                                           | 0.17             | 0.12           | 0.69 | 3.9              | 26.03 | 27  | 85    | 3                   | 3.1     | 51.07              |
| AB                                                                       | 5.03             | 4.19 | 0.20                                           | 0.06             | 0.09           | 0.34 | 3.9              | 23.73 | 24  | 92    | 1                   | 1.9     | 42.43              |
| BAf                                                                      | 5.2              | 4.17 | 0.60                                           | 0.17             | 0.11           | 0.88 | 3.1              | 18.86 | 20  | 78    | 4                   | 1.4     | 37.63              |
| Bf                                                                       | 5.35             | 4.42 | 0.20                                           | 0.09             | 0.06           | 0.35 | 3.5              | 19.43 | 20  | 91    | 2                   | 1.7     | 32.64              |
| BCr                                                                      | 5.48             | 4.52 | 0.30                                           | 0.12             | 0.06           | 0.48 | 3.5              | 18.15 | 19  | 88    | 3                   | 0.7     | 29.18              |
| <b>Deposition foothill – Abruptic Dystrorphic Yellow Argisol – Pad</b>   |                  |      |                                                |                  |                |      |                  |       |     |       |                     |         |                    |
| A1                                                                       | 4.23             | 3.88 | 0.30                                           | 0.15             | 0.13           | 0.58 | 4.3              | 27.72 | 28  | 88    | 2                   | 5.8     | 69.89              |
| A2                                                                       | 4.33             | 4.06 | 0.70                                           | 0.12             | 0.10           | 0.92 | 4.3              | 24.98 | 26  | 82    | 4                   | 3.3     | 43.39              |
| AB                                                                       | 4.74             | 4.15 | 0.20                                           | 0.06             | 0.06           | 0.32 | 4.9              | 18.66 | 19  | 94    | 2                   | 2.0     | 37.25              |
| Bt <sub>1</sub>                                                          | 4.83             | 4.22 | 0.70                                           | 0.09             | 0.07           | 0.86 | 4.2              | 26.5  | 27  | 83    | 3                   | 2.1     | 31.68              |
| Bt <sub>2</sub>                                                          | 4.8              | 4.25 | 0.60                                           | 0.17             | 0.06           | 0.84 | 4.6              | 25.86 | 27  | 85    | 3                   | 2.2     | 31.49              |
| Btf                                                                      | 4.23             | 3.88 | 0.30                                           | 0.15             | 0.13           | 0.84 | 4.9              | 24.73 | 26  | 85    | 3                   | 2.1     | 10.67              |

310 SB: sum of bases; CEC: cation exchange capacity; V: base saturation; m: aluminum saturation; OC: organic  
 311 carbon.

312 The bases Ca<sup>2+</sup>, Mg<sup>2+</sup>, and K<sup>+</sup> presented values ranging from 0.20 to 1.0 cmol<sub>c</sub> kg<sup>-1</sup> (Table 2). In general, the  
 313 magnitude of this variation is small among the landscape positions, which is mainly due to their reduced  
 314 contents in the minerals constituting the sandstone-gneiss and climate conditions that favor the advanced soil  
 315 weathering in the region. Moreover, the predominance of oxidic minerals generates positive charges, which,



316 allied with the more sandy texture, provided the loss or movement of these cations to subsurface horizons.  
317 This behavior, however, does not apply to K, which remained at higher concentrations near the soil surface.  
318 According to Neves et al. (2009), this is a characteristic attributed to the low diffusion power electrostatically  
319 adsorbed to negative charges of organic matter or the formation of sphere complexes external to the solid  
320 phase.  
321 Exchangeable aluminum ( $\text{Al}^{3+}$ ) content had no marked variation along the topolithosequence, with low values  
322 recorded in all profiles, mainly in the A horizon and increasing in depth. In addition, the potential acidity ( $\text{H}^+$   
323 and  $\text{Al}^{3+}$ ) values were high and increase in depth along the topolithosequence (Table 2). Possibly, the intense  
324 rainy season of the region associated with unimpeded drainage would be the determining climate factors to  
325 acidify the soil in depth (Campos et al., 2012).  
326 Along the topolithosequence, organic carbon (C<sub>org</sub>) contents were very higher in the surface horizons because  
327 of the concentration of organic matter from the decomposition of native vegetation (Santos et al., 2012). Cation  
328 exchange capacity (CEC) ranged from high to very high, with values between 12 and 28  $\text{cmol}_e \text{dm}^{-3}$ . The same  
329 trend occurred for the sum of bases (SB), which was higher in the A horizon mainly because of the OM and  
330 low clay content, which had low activity.  
331 Due to the low activity of the clay fraction, all segments were classified as dystrophic (Table 2). This evidence  
332 is a result of the depletion of bases ( $\text{Ca}^{2+}$ ,  $\text{Mg}^{2+}$ , and  $\text{K}^+$ ), which is in accordance with other investigations  
333 developed in the Amazon region (CAMPOS et al., 2012ab; Santos et al., 2012; Martins et al., 2006). This is  
334 an interesting aspect since it evidences the Amazon conditions related to the constitution of formation of the  
335 parent material associated with weathering conditions of climate, leading the values of base saturation to  
336 present a gradient coincident with the geomorphic surfaces, being dystrophic along the topolithosequence.  
337 This result is different from those found by Campos et al. (2010), who observed a higher degree of soil  
338 development at top positions and dominance of dystrophic soils.  
339 Soils were considered alic along the topolithosequence, with values of aluminum saturation (m) ranging from  
340 51 to 91%. Martins et al. (2006) studied soils in a transition fields-forest in the region of Humaitá, AM, and  
341 also reported the percentage magnitude found here. This is an inherent characteristic of the sandstone-gneiss,  
342 which has by nature an acidic character. The richness in Al justifies the formation of gibbsite in the Neosols  
343 (upper and lower third), as mentioned.

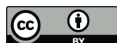

344 Available phosphorus (P) contents showed a similar behavior along the topolithosequence, with an average of  
 345 2.0 mg kg<sup>-1</sup> and decreasing in depth. Silva et al. (2005) stated that P remains stable in depth due to its low  
 346 mobility. Another point considered is the strong affinity of iron oxides, mainly goethite in phosphorus retention  
 347 (Pinto et al., 2013; Rotta et al., 2015). Goethite soils, as is our study, have their P adsorption affinity potentiated  
 348 because of the high isomorphic substitution (IS) and SSA of Gt. However, the positions at the top and transport  
 349 and deposition foothills presented values of 4.6 and 5.8 mg kg<sup>-1</sup>, respectively, of available phosphorus in the  
 350 A horizon, with the highest values in the topolithosequence. This would be an effect of OM accumulation in  
 351 the form of litter on the soil surface horizon. In addition, OM acts as a physical barrier, inhibiting the direct  
 352 contact of P to the soil active sites, thus allowing P in the available soil fraction (Fink et al., 2014).

#### 353 4.4 Mineralogical attributes

354 The mineralogy of the clay fraction (Table 3) of diagnostic and transitional B horizons showed the coexistence  
 355 of the minerals kaolinite (Kt), gibbsite (Gb), hematite (Hm), and goethite (Gt). In a preferred order, Fe oxides,  
 356 Hm, and Gt predominate as follows: transport foothill (9–41g kg<sup>-1</sup>) > deposition foothill (5–39 g kg<sup>-1</sup>) > top  
 357 (5–24 g kg<sup>-1</sup>) > upper and lower third (1–5 g kg<sup>-1</sup>). Among the iron oxides, Gt participated in the clay fraction  
 358 of all studied soils, which is due to the iron poverty of sandstone-gneiss sediments (Correa et al., 2008; Santos  
 359 et al., 2010). Under this lithological condition, Gt preferably has its formation favored (Barrón and Torrent,  
 360 2002; Viscarra Rossel et al., 2010), as shown by the low Hm contents, with a maximum value of 9 g kg<sup>-1</sup> in  
 361 the topolithosequence.

362 TABLE 3. Crystallographic attributes of soil minerals of a topolithosequence in Amazonas, Brazil.

| Soil    | MCD               |                   |                   |                   | WHH  |      | SSA                            |      | IS                    |      | Ratio      | Content            |    |
|---------|-------------------|-------------------|-------------------|-------------------|------|------|--------------------------------|------|-----------------------|------|------------|--------------------|----|
|         | °2θ               |                   |                   |                   |      |      | m <sup>2</sup> g <sup>-1</sup> |      | mol mol <sup>-1</sup> |      |            | g kg <sup>-1</sup> |    |
|         | Gt <sub>110</sub> | Gt <sub>111</sub> | Hm <sub>110</sub> | Hm <sub>012</sub> | Kt   | Gb   | Gt                             | Hm   | Gt                    | Hm   | Kt/(Kt+Gb) | Gt                 | Hm |
| CXvd_AB | 20.6              | 9.4               | 21.6              | 31.1              | 0.5  | 0.25 | 116.3                          | 54.4 | 0.43                  | 0.07 | 0.56       | 24                 | 5  |
| CXvd_Bi | 15.2              | 8.9               | 16.4              | 54.6              | 0.51 | 0.31 | 159.7                          | 79.9 | 0.15                  | 0.02 | 0.45       | 21                 | 5  |
| RRd_ACr | 25.1              | 18.2              | 25.4              | 28.3              | 0.50 | 0.17 | 94.6                           | 41.3 | 0.38                  | 0.04 | 0.87       | 5                  | 1  |
| RQo_Cr  | 25.1              | 13.9              | 12.8              | 36.6              | 0.70 | 0.28 | 94.6                           | 89.4 | 0.33                  | 0.02 | 0.76       | 5                  | 1  |
| FTd_Bf  | 18.5              | 14.9              | 22.8              | 30.2              | ni   | 0.34 | 130.1                          | 47.2 | 0.39                  | 0.12 | 0.37       | 41                 | 9  |
| FTd_BAf | 10.4              | 7.8               | 15.0              | 89.6              | 0.48 | 0.30 | 234.3                          | 78.6 | 0.31                  | 0.11 | 0.41       | 40                 | 9  |
| PAd_Bf  | 23.7              | 11.9              | 13.9              | 63.0              | 0.55 | 0.28 | 100.5                          | 77.5 | 0.36                  | 0.17 | 0.63       | 39                 | 9  |
| PAd_Btf | 28.4              | 21.2              | 17.7              | 49.1              | 0.50 | 0.27 | 82.93                          | 63.5 | 0.44                  | 0.13 | 0.60       | 25                 | 5  |

363 MCD: mean crystal diameter; WHH: width at half-height, SSA: specific surface area, IS: isomorphic

364 substitution; Gt:goethite; Hm: hematite; Kt: kaolinite; Gb: gibbsite; ni: not identified.





365 In general, the crystallographic parameters (MCD, WHH, SSA, and IS) were sensitive to the peculiarities of  
366 the topolithosequence (Table 3). The mean crystal diameter (MCD) values for Gt110 (10–28 nm) and Gt111  
367 (9–21 nm) peaks lower than Hm111 (12–25 nm) and Hm012 (30–89 nm) peaks revealed the persistence of the  
368 crystalline Hm in relation to Gt, a common characteristic in tropical soils (Inda Júnior and Kämpf, 2005;  
369 Barbieri *et al.*, 2014) clearly observed in the transport foothill, where peaks referring to the face of Hm012 are  
370 well-defined and narrow (Figure 4). The climatic conditions of the Amazon, especially precipitation and  
371 temperature, combined with the natural increase of OM, acid pH (Table 2), and intense microbial activity,  
372 contribute to a higher presence of Al in the goethite structure, which decreases its crystallinity.

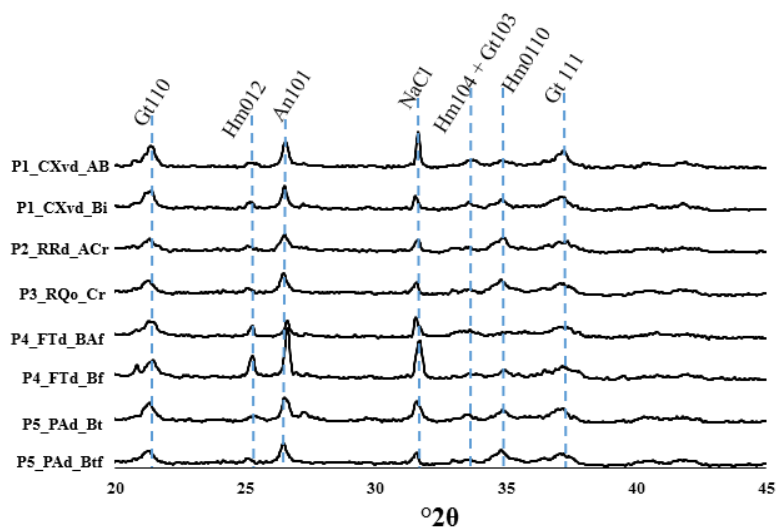

373  
374 Figure 4. X-ray diffractograms of the clay fraction for hematite (Hm) and goethite (Gt) in the profiles of Haplic  
375 Cambisol (CXvd\_AB), Regolithic Neosol (RRd\_ACr), Quartzarenic Neosol (RQod\_Cr), Argiluvic Plinthosol  
376 (FTd\_Bf; P4\_FTd\_BAf), and Yellow Argisol (PAd\_Bt; P5\_PAd\_Btf) in Amazonas, Brazil.

377 Except for the top position, values of isomorphous substitution (IS) higher than 0.33 mol mol<sup>-1</sup>, regardless of  
378 the soil position in the topolithosequence, indicate soils with a markedly weathering, non-hydromorphic, and  
379 acid pH (high Al activity) (Table 2). These conditions justify the persistence of Gt with a high Fe substitution  
380 ( $r=0.065$ ) by Al ( $r=0.053$ ), which promoted the contraction of the unit cell and, consequently, increased the  
381 specific surface area (SSA), ranging from 82 to 234 m<sup>2</sup> g<sup>-1</sup> in Gt and 41 to 89 m<sup>2</sup> g<sup>-1</sup> in Hm. These results are  
382 consistent with those found by other authors in Brazilian soils (Melo *et al.*, 2001; Correa *et al.*, 2008; Carvalho



383 Filho et al., 2015) since the highest values of IS and SSA in Gt are attributed to its higher structural capacity  
384 to accommodate Al in relation to Hm (Schwertmann and Taylor, 1989; Rolim Neto et al., 2004).  
385 The contents of Fe oxides are concentrated in the soils in the following order: transport foothill > deposition  
386 foothill > top > upper and lower third (Table 3 and Figure 4). In turn, the highest contents of Fe oxide,  
387 especially Hm in the Plinthosol (P4), are due to an increase of iron in the BAf and Bf horizons, characterized  
388 by the presence of ferruginous concretions, which is peculiar to Plinthosols in the study region (Campos et al.,  
389 2012). Well-formed peaks of Gt were observed even in poorly developed profiles, as in the case of RQo\_Cr,  
390 in which the presence of lytic contact (weak rock or outcropping saprolite) is noticeable (Figure 4). This fact  
391 was already expected since goethite is the first Fe oxide formed in the early stages of pedogenesis in the initial  
392 horizons close to the rock (Curi and Franzmeier, 1984; Silva, 2016).  
393 The Kt/(Kt+Gb) ratio showed that Gb is an important constituent of the mineralogical assembly of the studied  
394 soils, except for upper and lower thirds and deposition foothill (Table 1 and Figure 5). The lower Kt contents,  
395 as well as its absence in the transport foothill, are probably due to the higher iron oxides contents, which may  
396 have disrupted Kt nucleation, a behavior also observed in the studies of Gidhin et al. (2006). This resulted in  
397 the highest values of width at half-height (WHH), which ranged from 0.483 to 0.703 nm when compared to  
398 Gb crystals, which in turn ranged from 0.273 to 0.307 nm. This result indicates that Gb crystals are much more  
399 crystalline than Kt, which is soil characteristic with a higher degree of weathering (Gidhin et al., 2006;  
400 Camargo et al., 2008), in which the growth of Gb crystals are favored by the low Si concentration in the soil  
401 (HSU, 1989).

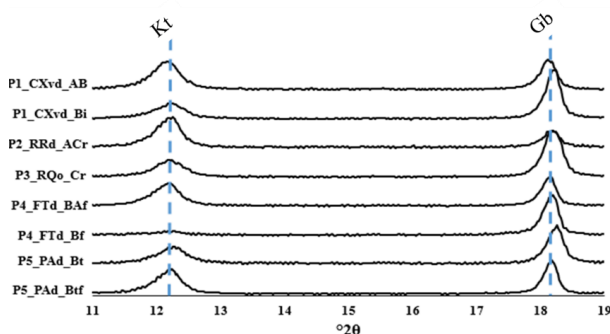

402  
403 Figure 5. X-ray diffractograms of the clay fraction for kaolinite (Kt) and gibbsite (Gb) in the profiles of Haplic  
404 Cambisol (CXvd\_AB), Regolithic Neosol (RRd\_ACr), Quartzarenic Neosol (RQod\_Cr), Argiluvic Plinthosol



405 (FTd\_Bf; P4\_FTd\_BAf), and Yellow Argisol (PAd\_Bt; P5\_PAd\_Btf) in Amazonas, Brazil.  
406 The proportions of  $Kt[Kt/Kt+Gb > 75]$ , associated with the low iron oxide contents found in Neosol profiles,  
407 confirm the lower intensity of pedogenesis or that morphogenesis predominated over the pedogenesis  
408 (Scarciglia et al., 2005). Thus, the geomorphological characteristics such as a more rugged and dissected  
409 topography of Neosol environments (Figure 3) favored the partial removal of basic cations and silicon, which  
410 are combined in the soil to form Kt (Kämpf et al., 2009). In addition, part of this Si and Al removed from the  
411 weathering of soils located at the landscape top could have been transported and accumulated in the lower  
412 landscape positions, which increased the values of the  $Kt[Kt/Kt+Gb > 60]$  ratio in Argisols (P5). These  
413 evidences are in accordance with several studies (Curi and Franzmeier, 1984; Ghidin et al., 2006; Campos et  
414 al., 2007; Silva, 2016), which considered the landscape a passive factor of formation and retribution of  
415 pedogenic minerals.

## 416 **5 Conclusions**

417 Landscape separation into compartments and parent material identification were efficient for understanding  
418 the variation of soil attributes along the transect.

419 Variations in soil classes are related to topography surfaces and parent material, thus showing variations related  
420 to physical, chemical, morphological, and mineralogical attributes.

421 The mineralogy of the clay fraction is composed of kaolinite, goethite, hematite, and gibbsite, with goethite  
422 being the predominant iron oxide. In addition, mineralogy confirmed that the chemical properties, especially  
423 the cations of exchangeable bases, from sediments originating from these soils were naturally poor in bases  
424 and, therefore, not related to the removal process of the system, as it is widely recognized in the Amazon  
425 region.

426 A sand fraction dominance was observed in relation to the other fractions in all the surfaces, which is related  
427 to the alluvial nature of the parent material, with the highest values occurring in the Quartzarenic Neosol and  
428 increasing values as soil profile deepens.

## 429 **Acknowledgment**

430 Conselho Nacional de Desenvolvimento Científico e Tecnológico (CNPq), Coordenação de Aperfeiçoamento  
431 de Pessoal de Nível Superior (CAPES), Fundação de Amparo à Pesquisa no Estado do Amazonas (FAPEAM).

## 432 **References**



- 433 Barbieri D. M., Marques Júnior J., Siqueira D.S., Teixeira D.B., Panosso A.R., Pereira G.T., La Scala Junior  
434 N. Iron oxides and quality of organic matter in sugarcane harvesting systems. *Revista Brasileira de Ciência do*  
435 *Solo*. 38, 1143-1152. <http://dx.doi.org/10.1590/S0100-06832014000400010>, 2014.
- 436 Barrón V., Torrent J. Evidence for a simple pathway to maghemite in earth and mars soils. *Geochimica et*  
437 *Cosmochimica Acta*, 66, 2801-2806. [https://doi.org/10.1016/S0016-7037\(02\)00876-1](https://doi.org/10.1016/S0016-7037(02)00876-1), 2002.
- 438 Bockheim J.G., Gennadiyev N.A., Hammer R.D., Tandarich J.P. Historical development of key concepts in  
439 pedology. *Geoderma*. 124, 23-36. <https://doi.org/10.1016/j.geoderma.2004.03.004>, 2005.
- 440 BRASIL. Ministério das Minas e Energia. Projeto Radam Brasil. Brasil: 1978.
- 441 Camargo L.A., Marques J.R.J., Pereira G.T., Horvat R. Variabilidade espacial de atributos mineralógicos de  
442 um Latossolo sob diferentes formas do relevo. I - Mineralogia da fração argila. *Revista Brasileira de Ciência*  
443 *do Solo*. 32, 2269–2277. <http://dx.doi.org/10.1590/S0100-06832008000600006>, 2008.
- 444 Campos M.C.C. Relações solo-paisagem: conceitos, evolução e aplicações. **Ambiência**, 8: 963-982.  
445 doi:10.5777/ambiencia.2012.05.01rb, 2012c.
- 446 Campos M.C.C., Ribeiro M.R., Souza Júnior V.S., Ribeiro Filho M.R., Almeida M.V. *Revista Brasileira de*  
447 *Ciência do Solo*. 36: 325 – 336, 2012b.
- 448 Campos M.C.C., Marques Júnior J., Pereira G.T., Montanari R., Camargo L.A. Relações solo-paisagem em  
449 uma litossequência arenito-basalto na região de Pereira Barreto, SP. *Revista Brasileira de Ciência do Solo*. 31,  
450 519-529, 2007.
- 451 Campos M.C.C., Ribeiro M.R., Souza Júnior V.S., Ribeiro Filho M.R., Costa E.U.C. Segmentos de vertente e  
452 atributos do solo de uma topossequência na região de Manicoré, AM. *Revista Ciência Agronômica*. 41, 501-  
453 510, 2010.
- 454 Campos M.C.C., Ribeiro M.R., Souza Júnior V.S., Ribeiro Filho M.R., Souza R.V.C. Relações solo-paisagem  
455 em uma topossequência sobre substrato granítico em Santo Antônio do Matupi, Manicoré (AM). *Revista*  
456 *Brasileira de Ciência do Solo*. 35, 13-23. <http://dx.doi.org/10.1590/S0100-06832011000100002>, 2011.
- 457 Campos M.C.C., Ribeiro M.R., Souza Júnior V.S., Ribeiro Filho M.R., Souza R.V.C.C., Almeida M.C.  
458 Topossequência de solos na transição Campos Naturais-Floresta na região de Humaitá, Amazonas. *Acta*  
459 *Amazônica*. 42, 387-398. <http://dx.doi.org/10.1590/S0044-59672012000300011>, 2012a.
- 460 Carvalho Filho A., Inda Júnior A.V., Fink J.R., Curi N. Iron oxides in soils of different lithological origins in



- 461 Ferriferous Quadrilateral (Minas Gerais, Brazil). *Applied Clay Science*. 118, 1–75.  
462 <https://doi.org/10.1016/j.clay.2015.08.037>, 2015.
- 463 Correa M.M., Ker J.C., Barrón V., Fontes M.P.F., Torrent J., Curi N. Caracterização de óxidos de ferro de  
464 solos do ambiente tabuleiros costeiros. *Revista Brasileira de Ciência do Solo*. 32, 1017-1031.  
465 <http://dx.doi.org/10.1590/S0100-06832008000300011>, 2008.
- 466 CPRM, Serviço Geológico do Brasil. Centro de Pesquisa de Recursos Minerais. Hidroclimatologia, geologia,  
467 recursos minerais, geomorfologia e unidades de paisagens. Relatório Técnico. Manaus: 2001.
- 468 Curi N., Franzmeier D.P. Toposequence of Oxisols from the Central Plateau of Brazil. *Soil Science Society  
469 America Journal*. 48, 341- 346. doi:10.2136/sssaj1984.03615995004800020024x, 1984.
- 470 Dalamerlinda E.A., Souza Júnior V.S., Wadt P.G.S., Deng Y., Campos M.C.C., Câmara, E.R.G. Soil-  
471 landscape relationship in a chronosequence of the middle Madeira River in southwestern Amazon, Brazil.  
472 *Catena*. 149: 199-208. <https://doi.org/10.1016/j.catena.2016.09.021>, 2017.
- 473 Dalrymple J.B., Blong R.J., Conacher A.J. A hypothetical nine unit landsurface model. *Z. Geomorphology*.  
474 12, 60-76, 1968.
- 475 Donagema G.K., Campos D.V.B., Calderano S.B., Teixeira W.G., Viana J.H.M. Manual de métodos de análise  
476 de solo. 3rd ed. Rio de Janeiro: Embrapa Solos, 2017.
- 477 Fink J.R., Inda A.V., Bayer C., Torrent J., Barrón V. Mineralogy and phosphorus adsorption in soils of south  
478 and central-west Brazil under conventional and no-tillage systems. *Acta Science Agronomic*. 36, 379–387.  
479 <http://dx.doi.org/10.4025/actasciagron.v36i3.17937>, 2014.
- 480 Ghidin A.A., Melo V.F., Lima V.C., Lima J.M.J.C. Toposequências de latossolos originados de rochas  
481 basálticas no paran. I – Mineralogia da fração argila. *Revista Brasileira Cincia Solo*. 30, 293-306.  
482 <http://dx.doi.org/10.1590/S0100-06832006000200010>, 2006.
- 483 Hsu P.H., Dixon J.B., Weed S.B. In: Aluminium oxides and oxyhydroxides. eds. *Minerals in soil environments*.  
484 2nd ed. Madison; Soil Science Society of America: 331- 378. 1989.
- 485 Inda Júnior A.V., Kmpf N. Variability of goethite and hematite via reductive dissolution in soils of the tropical  
486 and subtropical. *Revista Brasileira Cincia Solo*. 29, 851-866. [http://dx.doi.org/10.1590/S0100-  
487 06832005000600003](http://dx.doi.org/10.1590/S0100-06832005000600003), 2005.
- 488 Kmpf N. Die Eisenoxidmineralogie einer Klimasequenz von Bden aus Eruptiva in Rio Grande do Sul,



- 489 Brasilien. Doctoral thesis. Freising, Technische Universitat München, Munique, 1981.
- 490 Kämpf N, Curi N, Marques J.J. Óxidos de alumínio, silício, manganês e titânio. In: Melo, V.F. and Alleoni  
491 L.R.F. Química e mineralogia do solo. Viçosa: Sociedade Brasileira de Ciência do Solo, 2000.
- 492 Kämpf N, Curi N. Tópicos em ciência do solo - óxidos de ferro: Indicadores de ambientes pedogênicos e  
493 geoquímicos. Viçosa: Sociedade Brasileira de Ciência do Solo, 2000.
- 494 Klug H.P., Alexander L.E. X-Ray Diffraction Procedures for Polycrystalline and Amorphous Materials. New  
495 York: Wiley, 1974.
- 496 Kroth P.L. Disponibilidade de fósforo no solo para plantas e fatores que afetam a extração por resina de troca  
497 em membrana. Universidade Federal do Rio Grande do Sul, Porto Alegre, 1988.
- 498 Li Z.W., Zhang G.H., Geng R., Wang H. Rill erodibility as influenced by soil and land use in a small watershed  
499 of the loess plateau, China. Biosystems Engineering. 129, 248-257.  
500 <https://doi.org/10.1016/j.biosystemseng.2014.11.002>, 2015.
- 501 Marques Júnior J., Lepsch I.F. Depósitos superficiais neocenozóicos, superfícies geomórficas e solos em  
502 Monte Alto, SP. Geociências. 19, 90-106, 2000.
- 503 Martins G.C., Ferreira M.M., Curi M., Vitorino A.C.T., Silva M.L.N. Campos nativos e matas adjacentes da  
504 região de Humaitá (AM): atributos diferenciados dos solos. Ciência e Agrotecnologia. 30, 221-227.  
505 <http://dx.doi.org/10.1590/S1413-70542006000200005>, 2006.
- 506 Mehra O.P., Jackson M.L. Iron oxide removal from soils and clays by a dithionite-citrate system buffered with  
507 sodium bicarbonate. In: Swineford A. National conference on clays and clay mineral. Pergamon Press,  
508 Washington, 317-342. <https://doi.org/10.1016/B978-0-08-009235-5.50026-7>, 1960.
- 509 Melo V.F, Fontes M.P.F., Novais R.F., Singh B., Schaefer C.E.G.R. Caracterização dos óxidos de ferro e de  
510 alumínio de diferentes classes de solos. Revista Brasileira de Ciência do Solo. 25, 19-32.  
511 <http://dx.doi.org/10.1590/S010006832001000100003>, 2001.
- 512 Minasny B., Mcbratney A.B. Mechanistic soil-landscape modelling as an approach to developing pedogenetic  
513 classifications. Geoderma. 133, 138-149. <https://doi.org/10.1016/j.geoderma.2006.03.042>, 2006.
- 514 Montanari R., Marques Júnior J., Campos M.C.C., Souza Z.M., Camargo L.A. Caracterização mineralógica  
515 de Latossolos em diferentes feições do relevo na região de Jaboticabal, SP. Revista Ciência Agronômica. 41,  
516 191-199, 2010.



- 517 Murphy J., Riley J.P.A. Modified single solution method for the determination of phosphate in natural waters.  
518 *Anal Chimica Acta.* 27, 31-36. [https://doi.org/10.1016/S0003-2670\(00\)88444-5](https://doi.org/10.1016/S0003-2670(00)88444-5), 1972.
- 519 Neves, C.M.N., Silva, M.L.N., Curi, N., Macedo, R.L.G., Moreira, F.M.S., Norrish K., Taylor R.M. The  
520 isomorphous replacement of iron by aluminum in soil goethites. *Journal Soil Science.* 12, 294–306.  
521 <https://doi.org/10.1111/j.1365-2389.1961.tb00919.x>, 1961.
- 522 Pinto F.A., Souza E.D., Paulino H.B., Curi N., Carneiro M.A.C.P.: P-sorption and desorption in Savanna  
523 Brazilian soils as a support for phosphorus fertilizer management. *Ciência e Agrotecnologia.* 37, 521-530.  
524 <http://dx.doi.org/10.1590/S1413-70542013000600005>, 2013.
- 525 Ribeiro M.R., Oliveira L.B., Araujo Filho J.C., Ker J.C., Curi N., Schaefer C.E.G.R., Vidal-Tornado P.  
526 *Caracterização Morfológica do solo.* eds. *Pedologia; fundamentos*, 2012.
- 527 Rotta L.R., Paulino H.B., Anghinoni I., Souza E.D., Carneiro M.A.C. Phosphorus fractions and availability in  
528 a haplic plinthosol under no-tillage system in the brazilian cerrado. *Ciência e Agrotecnologia.* 39, 216-224.  
529 <http://dx.doi.org/10.1590/S1413-70542015000300002>, 2015.
- 530 Santos A.C., Pereira M.G., Anjos L.H.C., Bernini T.A., Cooper M., Nummer A.R., Francelino M.R. Gênese e  
531 classificação de solos numa topossequência no ambiente de mar de morros do médio Vale do Paraíba do Sul,  
532 RJ. *Revista Brasileira de Ciência do Solo.* 34, 1297-1314. [http://dx.doi.org/10.1590/S0100-](http://dx.doi.org/10.1590/S0100-06832010000400027)  
533 [06832010000400027](http://dx.doi.org/10.1590/S0100-06832010000400027), 2010.
- 534 Santos H.G., Jacomine P.K.T., Anjos L.H.C., Oliveira V., Lumberas J.F., Coelho M.R., Almeida J.A., Cunha  
535 T.J.F., Oliveira J.B. Centro Nacional de Pesquisa de Solos. *Sistema Brasileiro de Classificação de Solos.*  
536 Brasília, 353p, 2013.
- 537 Santos L.A.C., Campos M.C.C., Costa H.S., Pereira A.R.: Caracterização de solos em uma topossequência  
538 sob terraços aluviais na região do médio rio Madeira (AM). *Ambiência - Revista do Setor de Ciências Agrárias*  
539 *e Ambientais.* 8, 319-331. doi:10.5777/ambiencia.2012.02.07, 2012.
- 540 Santos R.D., Lemos R.C., Santos H.G., Ker J.C., Anjos L.H.C., Shimizu S.H.: *Manual de descrição e coleta*  
541 *de solos no campo.* 6nd ed. Viçosa: Sociedade Brasileira de Ciência do Solo, 2013.
- 542 Scarciglia F., Pera E., Critelli S.: Weathering and pedogenesis in the Sila Grande Massif (Calabria, South  
543 Italy): from field scale to micromorphology. *Catena.* 61, 1–29. <https://doi.org/10.1016/j.catena.2005.02.00>,  
544 2005.



- 545 Schiavo J.A., Pereira M.G., Miranda L.P.M.D., Neto D., Hypólito A., Fontana A.: Caracterização e  
546 classificação de solos desenvolvidos de arenitos da formação Aquidauana-MS. *Revista Brasileira de Ciência*  
547 *do Solo*. 3, 881-889. <http://dx.doi.org/10.1590/S0100-06832010000300029>, 2010.
- 548 Schulze D.G., Schwertmann U.: The influence of aluminium on iron oxides: X. Properties of Al-substituted  
549 goethites. *Clay Miner.* 19, 521–539. <https://doi.org/10.1180/claymin.1984.019.4.02>, 1984.
- 550 Schwertmann U., Kampf N.: The effect of environments on iron oxide minerals. *Advances Soil Science*. 1,  
551 172–200, 1985,
- 552 Schwertmann U., Taylor R.M.: Iron oxides. In: Dixon JB, Weed SB. *Minerals in soil environments*. 2nd ed.  
553 Soil Science Society of America, Madison, 379–438, 1989.
- 554 ~~Silva L. S.: Mineralogia da fração argila dos solos do Planalto Ocidental Paulista [dissertação]. Jaboticabal:~~  
555 ~~Faculdade de Ciências Agrárias e Veterinária, Universidade Estadual Paulista (UNESP), 2006.~~
- 556 Silva M.B., Anjos L.H.C., Pereira M.G., Nascimento R.A.M. Estudo de toposseqüência da baixada litorânea  
557 fluminense: Efeitos do material de origem e posição topográfica. *Revista Brasileira Ciência Solo*. 25, 965-976.  
558 <http://dx.doi.org/10.1590/S0100-06832001000400019>, 2001.
- 559 Skogley O., Dobermann A. Synthetic Ion-exchange Resins: Soil and environmental studies. *Journal of*  
560 *Environmental Quality*. 25, 13-24. doi: 10.2134/jeq1996.00472425002500010004x, 1996.
- 561 Sommer M.: Influence of soil pattern on matter transport in and from terrestrial biogeosystems - A new concept  
562 for landscape pedology. *Geoderma*. 133; 107–123. doi: 10.1016/j.geoderma.2006.03.040, 2006.
- 563 Vasconcelos V., Carvalho Júnior A.O., Martins E.S., Couto Júnior A.F., Guimaraes R.F., Gomes R.A.T.;  
564 Sistema de classificação geomorfométrica baseada em uma arquitetura sequencial em duas etapas: árvore de  
565 decisão e classificador espectral, no Parque Nacional da Serra da Canastra. *Revista Brasileira*  
566 *Geomorfologia*. 13, 171–186, 2012.
- 567 Rossel R.A.V., Rizzo R., Dematte J.A.M., Behrens T.: Spatial modeling of a soil fertility index using visible-  
568 near-infrared spectra and terrain attributes. *Soil Science Society of America Journal*. 74, 1293-130. doi:  
569 10.2136/sssaj2009.0130, 2010.
- 570 ZEE - Zoneamento Ecológico Econômico Do Sul-Sudeste Do Amazonas, Am. (2008) Zoneamento Ecológico  
571 Econômico do Sul-Sudeste do Amazonas. Manaus: IPAAM.
